# Supplementary material for: Formation of a palladium(ii) complex of 2-(2-pyridinylmethyleneamino)-2′-hydroxy-1,1′-binaphthyl with novel Cσ-coordination and its theoretical investigation
Source: Royal Society of Chemistry journal article supplement (doi:10.1039/b303477a), 2003-01-01
Supplement: b303477a.pdf [file b303477a.pdf]

*Crystal data for 2:* C<sub>28</sub>H<sub>24</sub>Cl<sub>2</sub>N<sub>2</sub>OSPd,  $M = 629.85$ , monoclinic, space group,  $P2(1)/n$ ,  $a = 10.0004(11)$ ,  $b = 16.0230(17)$ ,  $c = 17.039(2)$  Å,  $\beta = 101.884(2)^\circ$ ,  $V = 2671.8(5)$  Å<sup>3</sup>,  $T = 294(2)$  K,  $Z = 4$ ,  $D_c = 1.566$  g cm<sup>-3</sup>,  $F(000) = 1272$ , Mo-K $\alpha$  radiation ( $\lambda = 0.71073$  Å),  $\mu = 1.001$  mm<sup>-1</sup>. Of 18049 measured reflections, 6149 were unique ( $R_{\text{int}} = 0.0597$ ,  $2.75 < \theta < 27.55$ ),  $R_1 = 0.0459$ ,  $WR_2 = 0.0672$ , GOF = 1.020, for 336 parameters, final difference map extremes 0.846 and -0.72 e Å<sup>-3</sup>. CCDC 204888.

For **3**: C<sub>26.50</sub>H<sub>18</sub>Cl<sub>2</sub>N<sub>2</sub>OPd,  $M = 557.73$ , monoclinic, space group,  $P2(1)/c$ ,  $a = 14.178(3)$ ,  $b = 11.991(3)$ ,  $c = 15.086(3)$  Å,  $\beta = 115.863(5)^\circ$ ,  $V = 2307.8(8)$  Å<sup>3</sup>,  $T = 294(2)$  K,  $Z = 4$ ,  $D_c = 1.605$  g cm<sup>-3</sup>,  $F(000) = 1116$ , Mo-K $\alpha$  radiation ( $\lambda = 0.71073$  Å),  $\mu = 1.058$  mm<sup>-1</sup>. Of 15348 measured reflections, 5320 were unique ( $R_{\text{int}} = 0.0426$ ,  $1.60 < \theta < 27.54$ ),  $R_1 = 0.0443$ ,  $WR_2 = 0.1104$ , GOF = 1.013, for 307 parameters, final difference map extremes 0.938 and -0.669 e Å<sup>-3</sup>. CCDC 203389.
